# Supplementary material for: Development of a Deep Learning Model to Assist With Diagnosis of Hepatocellular Carcinoma
Source: Frontiers journal article supplement (doi:10.3389/fonc.2021.762733), 2021-12-01
Supplement: Data_Sheet_1.PDF [file Data_Sheet_1.PDF]

**Supplementary Figure** The visualization results of 20 elaborate annotated slides. There are five slides for each grade.

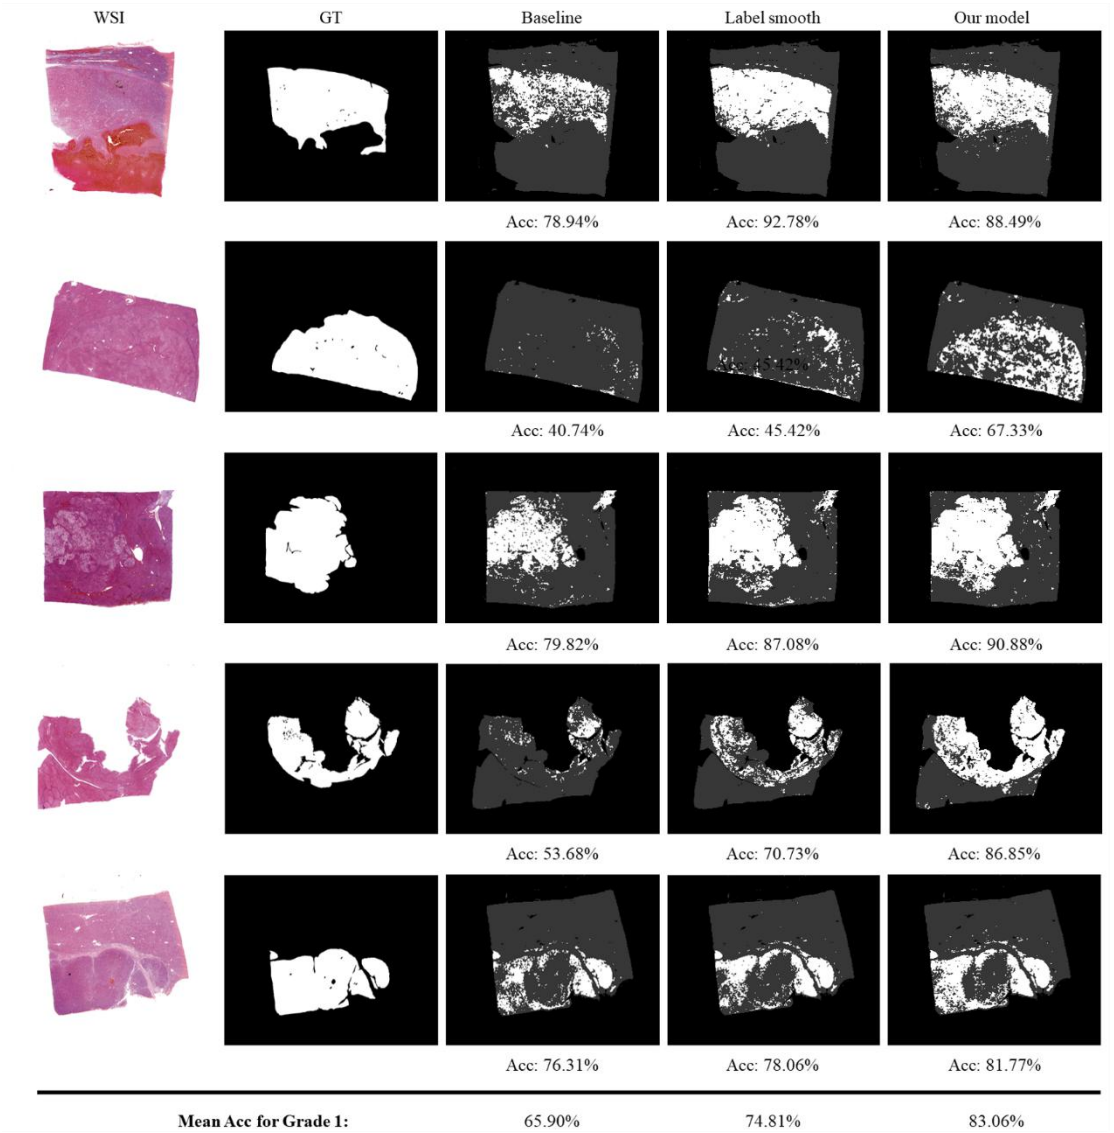

| WSI                                                                                 | GT                                                                                  | Baseline                                                                            | Label smooth                                                                         | Our model                                                                             |
|-------------------------------------------------------------------------------------|-------------------------------------------------------------------------------------|-------------------------------------------------------------------------------------|--------------------------------------------------------------------------------------|---------------------------------------------------------------------------------------|
| 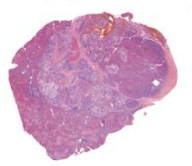   |    |    |    |    |
|                                                                                     |                                                                                     | Acc: 91.10%                                                                         | Acc: 93.18%                                                                          | Acc: 93.87%                                                                           |
|    |    |    |    |    |
|                                                                                     |                                                                                     | Acc: 90.31%                                                                         | Acc: 92.98%                                                                          | Acc: 95.29%                                                                           |
|    |    |    |    |    |
|                                                                                     |                                                                                     | Acc: 93.74%                                                                         | Acc: 93.49%                                                                          | Acc: 92.06%                                                                           |
|   |   |   |   |   |
|                                                                                     |                                                                                     | Acc: 49.75%                                                                         | Acc: 74.02%                                                                          | Acc: 73.86%                                                                           |
|  |  |  |  |  |
|                                                                                     |                                                                                     | Acc: 54.89%                                                                         | Acc: 80.68%                                                                          | Acc: 82.79%                                                                           |
| Mean Acc for Grade 2:                                                               |                                                                                     | 75.96%                                                                              | 86.87%                                                                               | 87.57%                                                                                |

| WSI                                                                                 | GT                                                                                  | Baseline                                                                            | Label smooth                                                                         | Our model                                                                             |
|-------------------------------------------------------------------------------------|-------------------------------------------------------------------------------------|-------------------------------------------------------------------------------------|--------------------------------------------------------------------------------------|---------------------------------------------------------------------------------------|
| 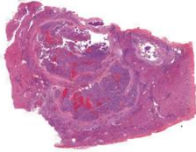   |    |    |    |    |
|                                                                                     |                                                                                     | Acc: 94.09%                                                                         | Acc: 93.50%                                                                          | Acc: 94.58%                                                                           |
|    |    |    |    |    |
|                                                                                     |                                                                                     | Acc: 97.57%                                                                         | Acc: 97.35%                                                                          | Acc: 97.61%                                                                           |
|    |    |    |    |    |
|                                                                                     |                                                                                     | Acc: 98.10%                                                                         | Acc: 97.40%                                                                          | Acc: 97.45%                                                                           |
|   |   |   |   |   |
|                                                                                     |                                                                                     | Acc: 85.86%                                                                         | Acc: 96.87%                                                                          | Acc: 95.85%                                                                           |
|  |  |  |  |  |
|                                                                                     |                                                                                     | Acc: 92.53%                                                                         | Acc: 93.65%                                                                          | Acc: 93.74%                                                                           |
| Mean Acc for Grade 3:                                                               |                                                                                     | 93.63%                                                                              | 95.75%                                                                               | 95.85%                                                                                |

| WSI                                                                                 | GT                                                                                  | Baseline                                                                            | Label smooth                                                                         | Our model                                                                             |
|-------------------------------------------------------------------------------------|-------------------------------------------------------------------------------------|-------------------------------------------------------------------------------------|--------------------------------------------------------------------------------------|---------------------------------------------------------------------------------------|
| 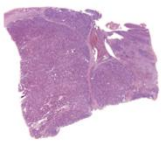   |    |    |    |    |
|                                                                                     |                                                                                     | Acc: 94.07%                                                                         | Acc: 91.63%                                                                          | Acc: 92.16%                                                                           |
|    |    |    |    |    |
|                                                                                     |                                                                                     | Acc: 94.93%                                                                         | Acc: 94.59%                                                                          | Acc: 94.16%                                                                           |
|    |    |    |    |    |
|                                                                                     |                                                                                     | Acc: 96.17%                                                                         | Acc: 95.03%                                                                          | Acc: 96.19%                                                                           |
|   |   |   |   |   |
|                                                                                     |                                                                                     | Acc: 93.76%                                                                         | Acc: 93.17%                                                                          | Acc: 93.38%                                                                           |
|  |  |  |  |  |
|                                                                                     |                                                                                     | Acc: 94.02%                                                                         | Acc: 92.82%                                                                          | Acc: 91.39%                                                                           |
| Mean Acc for Grade 4:                                                               |                                                                                     | 94.59%                                                                              | 93.45%                                                                               | 93.46%                                                                                |

## SUPPLEMENTARY MATERIAL

Here we show the visualization results of 20 elaborate annotated slides. There are five slides for each grade so that the model generalization can be better proofed. The overall accuracy of the CNN model with cross-entropy loss (baseline) is 82.52%, while our proposed model achieves 87.81%. Slides of grade 1 have low malignant degrees and are difficult to distinguish. Visualization results show our model is more accurate for these samples. The same conditions are reflected in some slides of grade 2 and grade 3, especially some ambiguous regions in the tumor. As for slides of grade 4, the two models' predicted results are basically the same.
